# Supplementary material
Source: MDPI journal article supplement (https://www.mdpi.com/2073-4395/2/2/74)
Supplement: s1 [file s1]

## Sheet: Supplemetary Table 1
Country	2000			2001			2002			2003			2004			2005			2006			2007			2008			2009			2010			Average
	Area (ha)	Yield (Hg/ha)	Production (t)	Area (ha)	Yield (Hg/ha)	Production (t)	Area (ha)	Yield (Hg/ha)	Production (t)	Area (ha)	Yield (Hg/ha)	Production (t)	Area (ha)	Yield (Hg/ha)	Production (t)	Area (ha)	Yield (Hg/ha)	Production (t)	Area (ha)	Yield (Hg/ha)	Production (t)	Area (ha)	Yield (Hg/ha)	Production (t)	Area (ha)	Yield (Hg/ha)	Production (t)	Area (ha)	Yield (Hg/ha)	Production (t)	Area (ha)	Yield (Hg/ha)	Production (t)	Area (ha)	Yield (Hg/ha)	Production (t)
Canada	1219900	2.348	2864300	1284800	1.5915	2044800	979200	1.3111	1283800	1149200	1.6802	1930900	1243900	2.4899	3097200	1266700	2.3633	2993600	1230500	2.0479	2519900	1442700	2.0342	2934800	1582200	2.2572	3571300	1487200	2.2723	3379400	1322100	2.165	2862400	1.29167e+06	2.05096	2.68022e+06
France	429000	4.514	1936500	417000	3.9808	1660000	337876	4.9208	1662610	366636	4.4094	1616660	357015	4.7079	1680780	316242	4.2097	1331290	241333	4.2107	1016190	164530	3.6109	594095	100245	4.5031	451416	113702	4.8095	546846	249965	4.3931	1098120	281231	4.38817	1.23586e+06
Russian Federation	535800	1.5215	815230	647600	1.9647	1272350	757500	1.6733	1267540	718000	1.4653	1052100	723000	1.7185	1242500	711800	1.583	1126790	711900	1.6163	1150640	622300	1.3862	862644	635400	1.978	1256830	770000	1.7518	1348890	820100	1.485	1217840	695764	1.64942	1.14667e+06
China	840000	1.2143	1020000	942000	1.189	1120000	950000	1.5789	1500000	940000	1.4894	1400000	878000	1.2073	1060000	1000000	1.155	1155000	900000	1.1256	1013000	981000	1.1009	1080000	925000	1.1892	1100000	875000	1.0971	960000	882000	1.123	990500	919364	1.22452	1.12714e+06
India	791500	1.0294	814800	654700	0.8602	563200	670300	0.9065	607600	663600	0.8914	591500	709500	1.0221	725200	791200	0.9929	785600	777800	0.9127	709900	590000	1.3559	800000	600000	1.25	749981	603233	1.2507	754459	650000	1.0769	700000	681985	1.04988	709295
Ukraine	285200	1.7511	499400	298900	2.0709	619000	324300	1.8908	613200	337600	1.0995	371200	258200	2.4644	636300	311100	1.9801	616000	326700	1.9979	652700	246800	1.0863	268100	201100	2.2621	454900	273000	1.8081	493600	278500	1.6244	452400	285582	1.82142	516073
United States of America	71225	2.2124	157578	77822	2.1933	170687	115539	1.8558	214413	132941	1.7749	235959	205502	2.5204	517957	309952	2.0492	635165	357786	1.6739	598880	328325	2.2501	738766	342894	1.6231	556560	339090	2.2924	777320	305950	2.1084	645050	235184	2.05035	477121
Australia	397000	1.1486	456000	337000	1.5193	512000	379713	0.4695	178286	354224	1.376	487428	412710	0.7011	289362	366000	1.5984	585000	384000	0.3646	140000	293000	0.9147	268000	299791	0.7944	238141	285000	1.2491	356000	277000	1.0108	280000	344131	1.01332	344565
Germany	141320	2.8934	408902	163610	3.4205	559633	148628	2.7803	413227	135916	2.8822	391739	121508	3.8204	464212	110300	3.1396	346300	92100	3.1238	287700	67668	2.6229	177487	48034	2.9262	140556	48323	3.4333	165907	58700	3.0102	176700	103282	3.09571	321124
United Kingdom	83600	3.6962	309000	102400	3.5254	361000	85000	3.4353	292000	73500	3.9184	288000	62280	3.45	214866	43000	3.7442	161000	44000	3.2955	145000	37000	3.5135	130000	29876	3.0459	91000	43000	3.2791	141000	38000	3.8684	147000	58332.4	3.52472	207261
Ethiopia	159450	0.7375	117595	216060	0.6784	146581	204025	0.9796	199854	228764	0.7447	170365	275045	0.8361	229954	253077	0.7785	197021	223087	0.817	182268	221715	0.9476	210095	211798	1.0951	231934	226533	1.0412	235872	226533	1.0224	231600	222372	0.879827	195740
Spain	41300	1.4097	58219	49937	1.0339	51629	79653	1.2583	100231	105248	1.4084	148231	137098	1.4676	201206	151540	0.8747	132549	149251	1.2718	189819	142199	1.1266	160207	101745	1.3521	137567	163800	0.9786	160300	201700	0.9628	194200	120316	1.19495	139469
Austria	27057	3.5665	96500	38567	2.9144	112400	41605	2.2425	93300	42097	2.2123	93132	39320	3.106	122128	36037	2.5045	90256	32652	2.7546	89943	28111	2.0162	56676	22306	2.0338	45365	15168	2.2909	34749	13562	2.4185	32800	30589.3	2.55093	78840.8
Belarus	75500	1.6291	123000	62100	1.6586	103000	46000	1.9783	91000	41323	2.2763	94062	42090	2.6224	110378	21753	2.3376	50849	24124	1.9391	46778	12692	2.403	30499	12530	3.1005	38849	17051	2.8648	48848	16278	2.2094	35964	33767.4	2.27446	70293.4
Denmark	35783	3.8286	137000	32142	3.4659	111400	37600	3.7074	139400	26500	3.9849	105600	23000	3.6217	83300	13300	3.2481	43200	8400	3.119	26200	4300	3.3023	14200	3300	3.2121	10600	5600	3.2857	18400	8700	3.2184	28000	18056.8	3.45401	65209.1
Czech Republic	33826	2.2248	75256	32135	2.5685	82538	27971	2.0073	56145	24086	2.2295	53700	21486	3.3493	71962	29121	2.7044	78756	27098	2.64	71540	22886	2.4033	55002	17385	2.3526	40900	21147	2.4526	51866	24400	1.9754	48200	25594.6	2.44615	62351.4
Sweden	27892	2.4165	67400	29928	2.5495	76300	31959	2.6409	84400	28838	2.7429	79100	33116	2.6573	88000	24160	2.707	65400	19320	2.6294	50800	13400	2.8433	38100	10700	2.7196	29100	16500	3	49500	22600	2.3938	54100	23492.1	2.66365	62018.2
Pakistan	135634	0.5756	78065	102700	0.5959	61200	96700	0.5884	56900	91000	0.5934	54000	97400	0.5903	57500	83700	0.5627	47100	90300	0.5792	52300	120700	0.5899	71200	105700	0.6036	63800	96900	0.6233	60400	82800	0.6522	54000	100321	0.595864	59678.6
Hungary	25464	1.8677	47559	26361	2.4324	64120	22508	2.1931	49362	22463	1.3439	30188	21735	2.9634	64409	19940	2.5183	50214	20148	2.449	49342	22286	2.288	50990	20710	2.2194	45963	19041	1.7072	32506	17975	2.0358	36593	21693.7	2.18347	47386
Myanmar	36400	0.7692	28000	37200	0.8065	30000	42000	0.7857	33000	41300	0.9153	37800	46900	0.9467	44400	45300	0.9581	43400	44500	1.018	45300	52600	1.0627	55900	54600	1.0952	59800	56000	1.1071	62000	53900	1.1614	62600	46427.3	0.965991	45654.5
Peru	42839	1.0359	44379	34503	1.1122	38375	36627	1.0828	39660	38024	1.0743	40851	37456	1.0005	37476	39164	0.9933	38902	44738	1.005	44960	44375	0.9764	43326	46774	0.9986	46710	50614	0.9952	50372	50582	1.0133	51254	42336	1.02614	43296.8
Colombia	24620	1.112	27378	24873	1.2221	30397	24708	1.3806	34113	26225	1.4967	39252	25642	1.4436	37016	27226	1.421	38688	26421	1.4406	38063	26828	1.7044	45725	29056	1.8647	54182	26642	1.88	50088	25000	2	50000	26112.8	1.54234	40445.6
Serbia	0	0	0	0	0	0	0	0	0	0	0	0	0	0	0	0	0	0	12389	2.9463	36502	13149	2.691	35384	13960	3.0128	42058	13481	2.8852	38895	13258	2.7706	36733	13247.4	2.86118	37914.4
Argentina	10000	1.12	11200	15000	1.3333	20000	18000	1.2222	22000	20000	1.2	24000	25000	1.12	28000	32000	1.125	36000	46000	1.1957	55000	42000	1.1905	50000	42627	1.2034	51299	46260	1.0306	47677	44800	1.1496	51500	31062.5	1.17185	36061.5
Burundi	48000	0.6206	29787	59225	0.5601	33174	48000	0.6944	33330	53084	0.6311	33500	60600	0.7066	42818	58939	0.6694	39454	53300	0.6237	33242	47000	0.6927	32557	46000	0.6726	30938	53000	0.7041	37316	45000	0.7007	31532	52013.5	0.661455	34331.6
Kazakhstan	10000	0.92	9200	15500	0.8774	13600	17974	1.483	26655	22510	1.3013	29293	26317	1.1997	31572	31000	1.2194	37800	24000	1.3417	32200	31382	1.5463	48526	31614	1.1028	34865	48000	1.0625	51000	69700	0.795	55410	29817.9	1.1681	33647.4
United Republic of Tanzania	64454	0.488	31454	79526	0.4525	35988	76129	0.5924	45101	65000	0.4615	30000	57375	0.5029	28854	50682	0.3997	20256	64000	0.4531	29000	64902	0.4991	32395	62681	0.5566	34889	68250	0.5544	37838	70000	0.5571	39000	65727.2	0.501573	33161.4
New Zealand	20000	3.2	64000	13000	2.9	37700	10925	2.6963	29457	9107	3.4259	31200	10000	3	30000	12500	3.04	38000	10500	3.0476	32000	6273	3.5155	22053	6185	3.2412	20047	7491	2.8302	21201	12018	3.0865	37094	10727.2	3.08938	32977.5
Poland	23441	1.9469	45637	19472	2.0421	39763	17581	2.288	40225	13278	2.0114	26708	12924	2.5405	32834	15031	2.2551	33897	15203	1.9031	28933	13454	2.4112	32440	10684	2.1877	23373	10700	2.3271	24900	13945	2.3467	32725	15064.8	2.20544	32857.7
Lithuania	25200	1.9722	49700	20300	1.4778	30000	18400	2.0109	37000	7400	2.9189	21600	11500	1.913	22000	12300	1.7154	21100	14800	1.0676	15800	15600	1.5513	24200	15300	1.902	29100	25200	1.996	50300	26800	1.4776	39600	17527.3	1.81843	30945.5
Romania	13100	1.084	14200	11700	1.8547	21700	14844	1.3777	20450	18135	1.2958	23500	23590	2.417	57018	12210	3.1778	38801	17530	2.0355	35682	19581	0.8811	17252	17416	2.0861	36332	21997	1.3608	29934	22353	1.769	39543	17496	1.75814	30401.1
Serbia and Montenegro	13270	1.7362	23040	13497	2.2045	29754	14459	2.5171	36395	13203	1.9204	25355	13321	2.5277	33671	12009	2.7628	33178	0	0	0	0	0	0	0	0	0	0	0	0	0	0	0	13293.2	2.27812	30232.2
Italy	4498	2.6916	12107	5914	3.1001	18334	8133	3.1064	25264	9770	3.0321	29624	10315	3.1486	32478	11144	3.0926	34464	13625	3.1317	42670	12558	3.2342	40615	10685	2.6308	28110	10800	2.6574	28700	11692	2.6404	30872	9921.27	2.95145	29385.3
Republic of Moldova	24526	0.6124	15019	19507	1.9374	37793	25570	0.9616	24587	20223	0.4769	9645	13320	2.167	28864	19091	1.7759	33903	17811	1.8992	33826	17890	0.4446	7953	10858	1.6779	18219	12000	1.0833	13000	18693	1.1476	21453	18135.4	1.28944	22205.6
Slovakia	14701	1.2389	18213	8991	2.5578	22997	8776	2.8581	25083	11773	1.6251	19132	10254	3.0587	31364	11581	2.4356	28207	9601	2.378	22831	9652	1.9945	19251	7311	2.633	19250	6462	2.6664	17230	9800	1.5306	15000	9900.18	2.27061	21687.1
Rwanda	29993	0.5115	15342	32125	0.5072	16293	31228	0.5132	16027	34732	0.5095	17697	32176	0.5209	16759	34796	0.5418	18854	32029	0.5508	17643	36850	0.5334	19656	38728	0.56	21689	45487	0.7431	33800	47658	0.7973	37999	35982	0.5717	21069
Morocco	30100	0.2023	6090	27500	0.4651	12790	39500	0.5461	21570	33100	0.6873	22750	38400	0.6737	25870	36400	0.3934	14320	36000	0.675	24300	37300	0.3193	11910	37900	0.4108	15570	39865	0.4968	19805	43100	0.5995	25840	36287.7	0.497209	18255.9
Uganda	29000	0.6897	20000	26000	0.5769	15000	27000	0.5926	16000	27000	0.5185	14000	25000	0.6	15000	25000	0.6	15000	26000	0.6154	16000	26000	0.6154	16000	26000	0.6154	16000	27000	0.6296	17000	26800	0.634	16990	26436.4	0.607955	16090
Switzerland	2580	3.5271	9100	2924	3.7278	10900	3989	4.011	16000	4982	3.5163	17518	4600	3.657	16822	4807	3.715	17858	5254	3.5021	18400	5243	3.4904	18300	4291	3.8802	16650	3715	3.9031	14500	3485	4.1713	14537	4170	3.73648	15507.7
Bangladesh	23877	0.7539	18000	22258	0.7638	17000	21449	0.746	16000	19830	0.7564	15000	21043	0.8079	17000	18211	0.7688	14000	14973	0.8014	12000	12500	0.7872	9840	12673	0.8408	10656	13779	0.9004	12406	13335	0.9559	12747	17629.8	0.8075	14059
Madagascar	4570	1.6455	7520	4590	1.6122	7400	4615	1.5536	7170	4640	1.5539	7210	4700	1.5915	7480	13842	1.2412	17180	14350	1.2404	17800	14500	1.2414	18000	14004	1.3843	19386	15248	1.3789	21025	15300	1.3464	20600	10032.6	1.43539	13706.5
Turkmenistan	4594	1.7414	8000	5000	1.6	8000	7900	1.2658	10000	8000	1.875	15000	5000	1.6	8000	5000	1.8	9000	5000	2.8	14000	6200	1.8065	11200	6220	1.7685	11000	8646	1.6874	14589	8500	1.7647	15000	6369.09	1.79175	11253.5
Finland	5200	2.25	11700	5400	2.1296	11500	5100	2.1765	11100	4100	2.4878	10200	2700	2.0741	5600	3700	2.1892	8100	4200	2.0952	8800	4400	2.4318	10700	3200	2.25	7200	4200	2.6667	11200	6100	2.1967	13400	4390.91	2.26796	9954.55
Mauritania	23184	0.3278	7600	29858	0.3316	9900	30000	0.3333	10000	30964	0.3361	10407	27023	0.2519	6806	30560	0.2686	8209	33518	0.2574	8629	36536	0.2714	9915	38050	0.281	10692	22949	0.5058	11608	30000	0.3333	10000	30240.2	0.318018	9433.27
Malawi	7370	0.4474	3297	15000	0.4667	7000	19500	0.4615	9000	21000	0.4762	10000	32000	0.5156	16500	27000	0.463	12500	30000	0.5	15000	12000	0.4167	5000	12178	0.3914	4767	13206	0.4962	6553	12700	0.4646	5900	18359.5	0.463573	8683.36
Tunisia	6100	0.5246	3200	6000	0.6917	4150	9400	0.4149	3900	12950	0.5147	6665	11470	0.653	7490	12500	0.7968	9960	13900	0.6475	9000	11100	0.9234	10250	12720	0.7571	9630	13200	0.9105	12019	15000	0.8467	12700	11303.6	0.698264	8087.64
Azerbaijan	2100	2.4286	5100	2200	2.8182	6200	2200	2.8182	6200	2600	2.6923	7000	3366	2.2748	7657	3551	2.2557	8010	3862	2.1253	8208	4376	1.9152	8381	5212	2.1113	11004	4860	1.9214	9338	5560	1.6545	9199	3626.09	2.27414	7845.18
Netherlands	1200	5	6000	1500	4.6667	7000	1700	4.1176	7000	2900	3.4483	10000	2700	3.963	10700	2321	4.2223	9800	1056	4.3561	4600	900	3.7778	3400	900	4.6667	4200	1200	4.75	5700	900	5	4500	1570.64	4.36077	6627.27
Estonia	3162	1.6822	5319	3226	1.5518	5006	2227	2.1679	4828	3973	1.2016	4774	4236	0.7618	3227	4282	1.3206	5655	4542	1.2107	5499	5608	1.6735	9385	4709	0.6776	3191	4830	1.5466	7470	6860	1.7604	12076	4332.27	1.41406	6039.09
Brazil	1467	2.5215	3699	1893	2.3465	4442	3336	2.3939	7986	2426	2.6331	6388	3957	2.7392	10839	2061	2.753	5674	1677	2.4896	4175	1727	2.2258	3844	2068	2.2868	4729	3040	2.2582	6865	3000	2.3333	7000	2422.91	2.45281	5967.36
Congo	6400	0.7656	4900	6991	0.7314	5113	7164	0.7656	5485	7200	0.7639	5500	7256	0.796	5776	7312	0.796	5820	7368	0.7959	5864	7000	0.7571	5300	7200	0.7639	5500	7846	0.761	5971	7900	0.7658	6050	7239.73	0.769291	5570.82
Libya	3100	1.5806	4900	3200	1.5625	5000	3500	1.6286	5700	3500	1.6286	5700	3250	1.6	5200	3200	1.6666	5333	3250	1.6	5200	3250	1.6	5200	3250	1.6	5200	3418	1.9351	6614	3500	1.6	5600	3310.73	1.63655	5422.45
Bolivia	3500	1.4286	5000	3800	1.345	5111	4000	1.3	5200	4100	1.2927	5300	3970	1.3023	5170	4000	1.3	5200	3959	1.3647	5403	4301	1.3808	5939	3797	1.4514	5511	3958	1.4404	5701	3900	1.4615	5700	3935	1.36976	5385
Belgium	1400	4.2143	5900	1400	4.3571	6100	1300	3.7692	4900	1746	4.9576	8656	1682	3.6564	6150	1338	3.4245	4582	1052	3.2804	3451	1014	3.0986	3142	794	4.4471	3531	1018	5.2122	5306	1100	4.1818	4600	1258.55	4.05447	5119.82
Algeria	7170	0.2222	1593	6570	0.5592	3674	7070	0.6088	4304	8680	0.7306	6342	9328	0.7902	7371	8299	0.6433	5339	9157	0.5876	5381	9184	0.6798	6243	7556	0.4788	3618	8487	0.7033	5969	9400	0.617	5800	8263.73	0.601891	5057.64
Syrian Arab Republic	91	1.2308	112	1428	1.2066	1723	1481	1.2039	1783	1200	1.8333	2200	2259	1.3285	3001	3300	1.5758	5200	4380	2.2991	10070	2787	2.0757	5785	4184	1.3631	5703	4127	1.6593	6848	4600	1.4565	6700	2712.45	1.5666	4465.91
Bulgaria	3500	1.4897	5214	4134	2.0987	8676	4100	2.17	8897	2250	1.688	3798	1814	2.6295	4770	1402	1.7439	2445	570	1.8596	1060	2219	1.2231	2714	1973	2.1622	4266	1525	1.2774	1948	2000	1.8	3600	2317	1.8311	4308
Tajikistan	5210	0.4699	2448	3710	0.5698	2114	5400	0.64	3456	5070	0.6608	3350	4483	0.5478	2456	5715	1.5475	8844	5900	0.7044	4156	6900	0.7593	5239	6243	0.6093	3804	6700	0.7761	5200	6860	0.8585	5889	5653.73	0.740309	4268.73
Bosnia and Herzegovina	1621	1.2221	1981	1454	1.6857	2451	1495	2.594	3878	1551	2.1941	3403	1527	2.7079	4135	1621	2.8495	4619	1646	3.4787	5726	1680	2.8851	4847	1530	2.6471	4050	1425	2.2463	3201	1416	2.4887	3524	1542.36	2.45447	3801.36
Ireland	500	3.4	1700	500	3.8	1900	500	4	2000	1000	4.7	4700	1000	4.5	4500	1000	5	5000	900	5.8889	5300	700	4.8571	3400	800	3.5	2800	1000	5	5000	1300	3.9231	5100	836.364	4.41537	3763.64
Paraguay	3569	0.8437	3011	3260	0.9399	3064	3293	0.884	2911	3045	0.8141	2479	4411	1.0537	4648	4970	1.0865	5400	4125	0.9236	3810	5000	0.8	4000	3260	0.7822	2550	5500	0.8	4400	5100	0.9804	5000	4139.36	0.900736	3752.09
Mexico	3085	1.0674	3293	3636	1.1458	4166	3125	1.1603	3626	3888	2.1121	8212	2602	1.618	4210	1774	1.0209	1811	3380	1.1204	3787	3602	1.1133	4010	1818	0.9901	1800	2482	0.8191	2033	3300	0.6667	2200	2972	1.16674	3558.91
Turkey	1330	2.3308	3100	1250	2.16	2700	1450	2.7586	4000	1150	3.0435	3500	1350	2.5926	3500	1400	2.5714	3600	1565	2.7942	4373	1265	2.7692	3503	1364	2.8739	3920	1224	2.9444	3604	1154	2.773	3200	1318.36	2.69196	3545.45
Belize	2800	1.5	4200	2350	1.4894	3500	2000	1.5	3000	2100	1.4938	3137	1800	1.5	2700	1697	1.3494	2290	2153	1.0339	2226	2343	1.0525	2466	2769	1.1076	3067	2690	1.3654	3673	2600	1.4231	3700	2300.18	1.34683	3087.18
Uruguay	1301	2.0377	2651	1200	2.1667	2600	1250	2.12	2650	1300	2.0769	2700	1250	2.12	2650	1300	2.0769	2700	1250	2.12	2650	1260	2.2222	2800	1300	2.0769	2700	1355	2.0613	2793	1300	2.1538	2800	1278.73	2.11204	2699.45
Slovenia	13	2.6923	35	39	2.9231	114	204	3.4069	695	364	1.6731	609	418	2.89	1208	1513	3.0278	4581	3340	2.9772	9944	1970	2.7376	5393	1211	3.1379	3800	648	2.1914	1420	513	2.2827	1171	930.273	2.72182	2633.64
Lesotho	6421	0.7475	4800	7814	0.8228	6429	11307	0.3383	3825	9076	0.2994	2717	3456	0.4332	1497	4447	0.4158	1849	4447	0.4441	1975	1851	0.2993	554	1641	0.5996	984	2032	0.689	1400	2000	0.55	1100	4953.82	0.512636	2466.36
Lebanon	980	2.5	2450	1000	2.5	2500	950	2.5263	2400	950	2.5263	2400	713	3.3661	2400	741	3.2389	2400	950	2.5263	2400	950	2.5263	2400	950	2.5263	2400	999	2.5025	2500	1100	2.1818	2400	934.818	2.62916	2422.73
Latvia	1400	2.1429	3000	2100	1.2381	2600	1900	1.7368	3300	2100	1.8095	3800	1500	1.8	2700	1600	1.5625	2500	800	1	800	900	1.5556	1400	700	1.5714	1100	1300	2	2600	1600	1.6875	2700	1445.45	1.64585	2409.09
Yemen	1752	1.3185	2310	1801	1.2726	2292	1642	1.2686	2083	1600	1.2563	2010	1315	1.4236	1872	1311	1.415	1855	1473	1.6388	2414	1650	1.7261	2848	1601	1.7077	2734	1598	1.719	2747	1600	1.75	2800	1576.64	1.49965	2360.45
The former Yugoslav Republic of Macedonia	1065	2.3484	2501	960	1.875	1800	1000	2.08	2080	920	2.4967	2297	1049	1.5253	1600	960	1.276	1225	895	1.9251	1723	901	2.0777	1872	963	2.5421	2448	1060	2.8509	3022	1568	1.7787	2789	1031	2.07054	2123.36
Chile	2012	0.8971	1805	2397	1.0288	2466	1182	0.7437	879	1297	0.7887	1023	1297	0.7887	1023	1414	1.1924	1686	1557	1.3706	2134	1262	1.4089	1778	1262	1.4089	1778	2752	1.2286	3381	2481	0.9229	2290	1719.36	1.07085	1840.27
Sierra Leone	1275	0.8	1020	1400	0.8214	1150	1506	0.7968	1200	1554	0.8179	1271	1750	0.8571	1500	1979	0.9141	1809	2171	0.8761	1902	2366	0.9235	2185	2464	0.9562	2356	1486	1.7214	2558	2100	1.1905	2500	1822.82	0.970455	1768.27
Ecuador	6727	0.2692	1811	6857	0.2699	1851	5253	0.1951	1025	4364	0.376	1641	3697	0.4247	1570	3720	0.4161	1548	3132	0.5527	1731	3519	0.3723	1310	4097	0.2856	1170	3342	0.2825	944	2754	0.468	1289	4314.73	0.355645	1444.55
Bhutan	0	0	0	0	0	0	0	0	0	70	3.5714	250	180	3.6778	662	1008	3.4673	3495	753	3.8499	2899	613	2.7961	1714	330	2.497	824	291	2.323	676	250	2.52	630	436.875	3.08781	1393.75
Democratic Rep. of the Congo	2815	0.4174	1175	2642	0.464	1226	3200	0.4	1280	3225	0.4	1290	3250	0.4	1300	3275	0.4	1310	3300	0.4	1320	3325	0.403	1340	3359	0.4031	1354	3660	0.4016	1470	3400	0.4	1360	3222.82	0.4081	1311.36
Luxembourg	431	2.8654	1235	693	3.2857	2277	544	3.3585	1827	480	3.7333	1792	395	3.5772	1413	334	3.2725	1093	257	3.249	835	299	2.3043	689	161	5.9938	965	207	4.1884	867	256	2.9766	762	368.818	3.5277	1250.45
Eritrea	4576	0.3649	1670	2035	0.5553	1130	3800	0.7361	2797	2000	0.7055	1411	748	0.1217	91	1699	0.0441	75	1525	0.4518	689	2059	0.3793	781	290	0.0483	14	2388	0.8342	1992	2400	0.8333	2000	2138.18	0.461318	1150
Uzbekistan	900	0.8444	760	600	0.6667	400	1300	0.3846	500	1000	0.7	700	1300	0.6154	800	1500	0.5333	800	1200	0.8333	1000	1000	0.9	900	1200	1.5	1800	2200	1.0455	2300	3000	0.7333	2200	1381.82	0.796045	1105.45
Niger	2000	0.4	800	2250	0.4	900	2500	0.4	1000	2645	0.3304	874	2750	0.4	1100	3500	0.3791	1327	4208	0.3315	1395	2500	0.4	1000	2752	0.3917	1078	1660	0.7048	1170	3000	0.4	1200	2705.91	0.4125	1076.73
Kyrgyzstan	0	0	0	0	0	0	0	0	0	617	1.3598	839	671	1.4203	953	631	1.3328	841	554	1.3231	733	1008	1.506	1518	543	1.4088	765	1065	1.3568	1445	1000	1	1000	761.125	1.33845	1011.75
Japan	300	2	600	500	2	1000	481	2.079	1000	465	2.1505	1000	462	2.1645	1000	420	2.381	1000	358	2.7933	1000	366	3.0055	1100	505	2.3762	1200	500	1.758	879	490	2.6531	1300	440.636	2.30555	1007.18
South Africa	700	1.1429	800	750	1.2	900	452	2.2124	1000	800	1.2913	1033	829	1.2449	1032	830	1.5361	1275	928	1.1315	1050	847	0.8028	680	731	1.2681	927	905	1.1669	1056	910	0.8791	800	789.273	1.26145	959.364
Croatia	300	2.1667	650	298	2.4799	739	400	2.215	886	500	2.67	1335	624	1.7628	1100	448	1.9933	893	326	2.1933	715	374	1.7914	670	351	2.4786	870	372	2.5672	955	221	1.5385	340	383.091	2.16879	832.091
Jamaica	1041	1.0134	1055	974	1.0657	1038	824	1.0146	836	932	1.0258	956	703	1.0341	727	660	1.0394	686	569	1.0931	622	516	1.0736	554	468	1.0812	506	678	1.1327	768	630	1.0825	682	726.818	1.05965	766.364
Greece	195	1.9538	381	208	1.7788	370	304	1.6612	505	400	1.165	466	376	3.3431	1257	400	1.6225	649	398	1.5678	624	453	1.4106	639	450	1.4222	640	481	1.4345	690	650	1.0462	680	392.273	1.67325	627.364
Guyana	850	0.5882	500	780	0.4821	376	783	0.5121	401	800	0.555	444	798	0.5376	429	811	0.5105	414	862	0.5046	435	869	0.5293	460	913	0.5586	510	952	0.5546	528	940	0.5638	530	850.727	0.536036	457
Dominican Republic	335	0.6209	208	331	0.6193	205	260	1.1538	300	280	1.25	350	290	1.2241	355	390	0.8154	318	474	0.8776	416	400	0.9125	365	381	0.7822	298	432	0.8495	367	400	0.75	300	361.182	0.895936	316.545
Israel	368	0.7908	291	344	0.6628	228	439	0.754	331	375	0.8	300	300	1	300	361	0.831	300	439	0.9408	413	421	1.0119	426	433	0.6813	295	455	0.611	278	500	0.5	250	403.182	0.780327	310.182
Venezuela	25	1.28	32	21	1.0952	23	185	0.7459	138	155	1.4452	224	198	1.4545	288	201	1.2836	258	200	1.28	256	298	1.2651	377	408	1.4657	598	400	1.5	600	390	1.5385	600	225.545	1.30488	308.545
Occupied Palestinian Territory	72	2.7778	200	100	2.5	250	190	2.6316	500	60	2.5	150	62	2.3226	144	60	2.2667	136	57	2.0702	118	53	2.3019	122	44	1.8864	83	46	2.3043	106	50	1.8	90	72.1818	2.30559	172.636
Armenia	22	1	22	26	1.0385	27	25	1.92	48	41	1.9756	81	116	1.2845	149	91	1.8242	166	118	1.0763	127	31	2.5161	78	59	2.1186	125	71	1.7465	124	76	2.1579	164	61.4545	1.6962	101
Georgia	80	0.675	54	131	0.6901	90	128	0.5781	74	112	0.6161	69	103	0.835	86	100	0.9	90	200	1	200	100	0.8	80	100	0.88	88	100	0.77	77	130	0.6154	80	116.727	0.759973	89.8182
Egypt	82	1.8293	150	99	1.8485	183	28	1.8571	52	33	1.8182	60	31	1.871	58	38	1.8421	70	40	1.6	64	47	1.617	76	44	1.8182	80	50	1.8	90	50	1.4	70	49.2727	1.75467	86.6364

## Sheet: Graph
	Year	2000	2001	2002	2003	2004	2005	2006	2007	2008	2009	2010
	Canada	2864300	2044800	1930900	1930900	3097200	2993600	2519900	2934800	3571300	3379400	2862400
	France	1936500	1660000	1616660	1616660	1680780	1331290	1016190	594095	451416	546846	1098120
	Russian Federation	815230	1272350	1052100	1052100	1242500	1126790	1150640	862644	1256830	1348890	1217840
	China	1020000	1120000	1400000	1400000	1060000	1155000	1013000	1080000	1100000	960000	990500
	India	814800	563200	591500	591500	725200	785600	709900	800000	749981	754459	700000
	Ukraine	499400	619000	371200	371200	636300	616000	652700	268100	454900	493600	452400
	United States of America	157578	170687	235959	235959	517957	635165	598880	738766	556560	777320	645050
	Australia	456000	512000	487428	487428	289362	585000	140000	268000	238141	356000	280000
	Germany	408902	559633	391739	391739	464212	346300	287700	177487	140556	165907	176700
	United Kingdom	309000	361000	288000	288000	214866	161000	145000	130000	91000	141000	147000
